# Supplementary material
Source: PubMed Central journal article supplement (PMC3911721)
Supplement: JVI.02098-13_zjv999098457so1.pdf [file JVI.02098-13_zjv999098457so1.pdf]

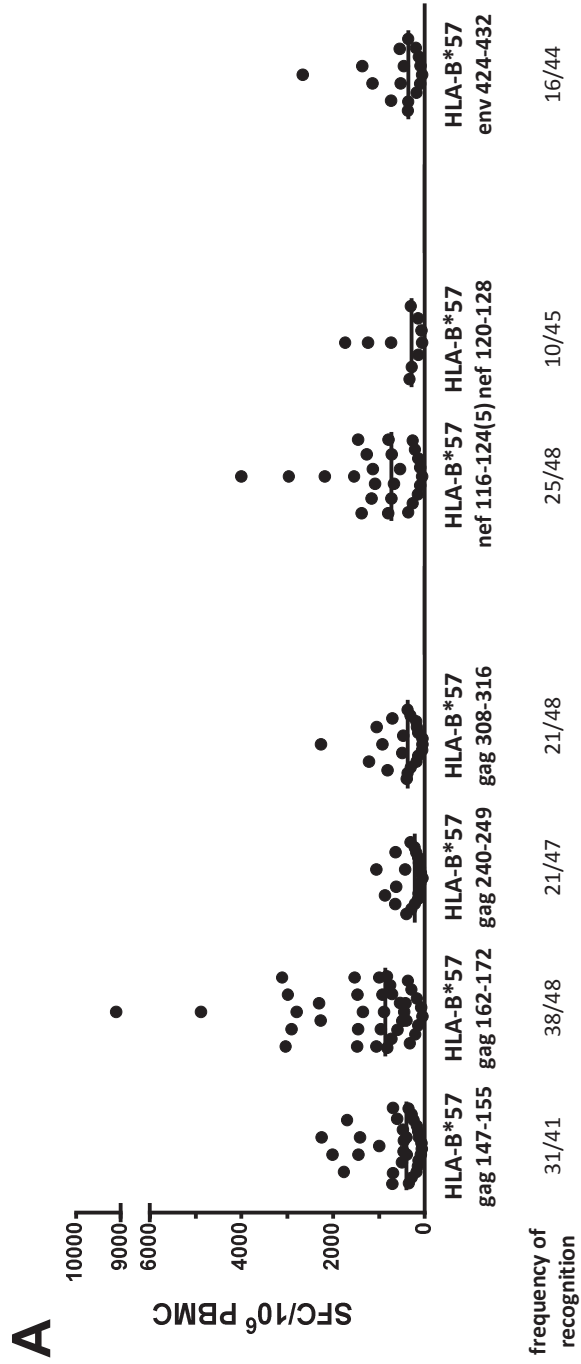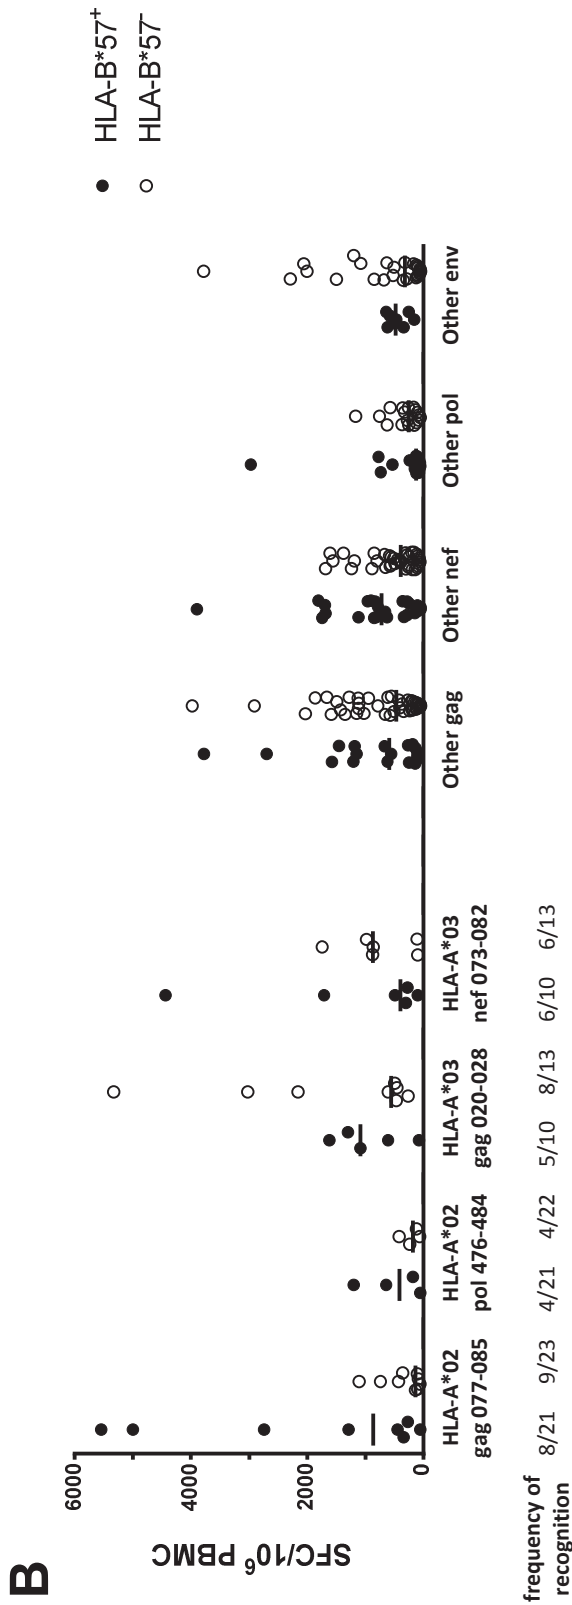

**Supplemental Figure 1:** Intensities and recognition frequencies of HIV-specific CD8<sup>+</sup> T cells measured by ELISpot IFN- $\gamma$  for HLA-B\*57-restricted peptides (A) and HLA-B\*57 non-restricted peptides (B) in HLA-B\*57<sup>+</sup> (black circles) and HLA-B\*57<sup>-</sup> (clear circles) subjects.

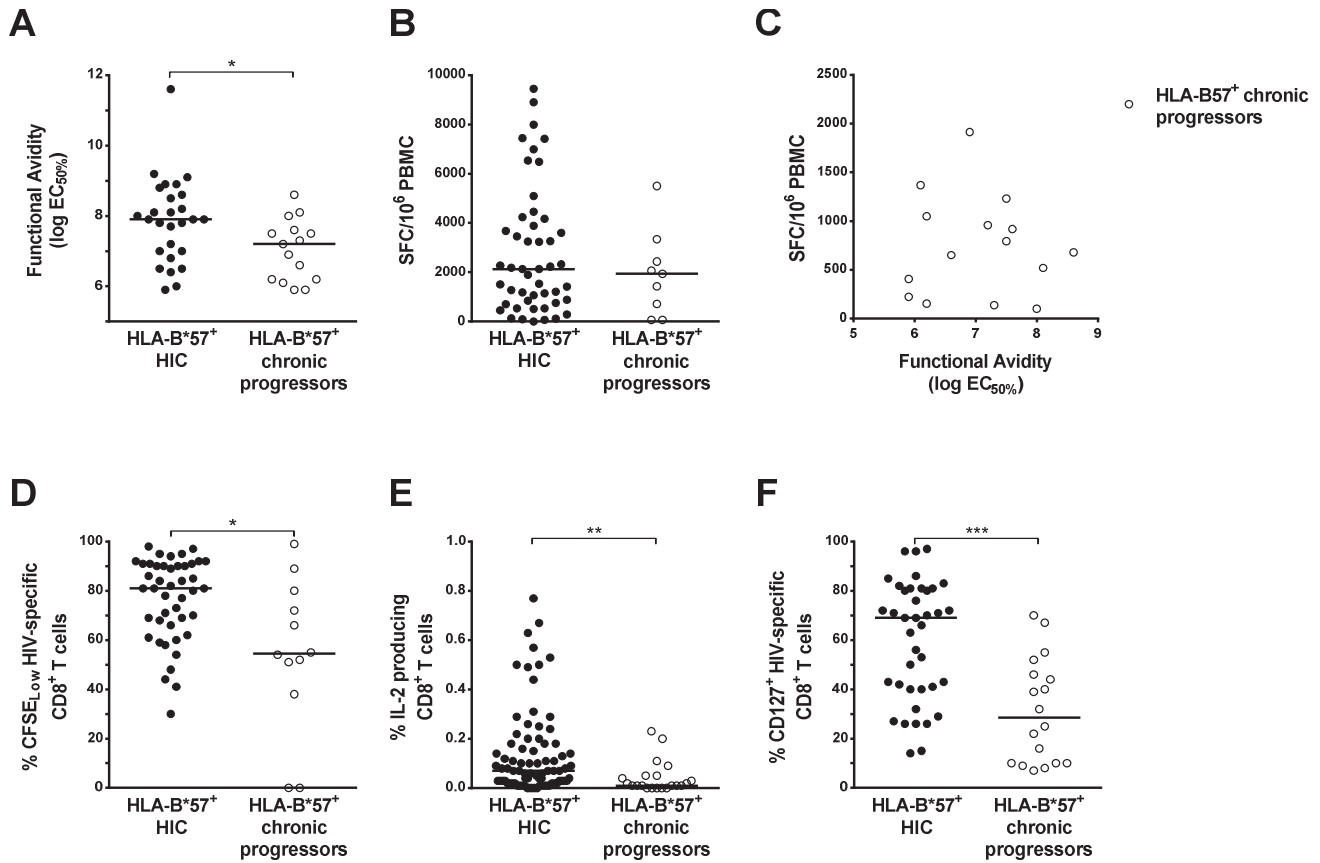

**Supplemental Figure 2:** Qualitative features of HIV-specific CD8<sup>+</sup> T cell responses restricted by HLA-B\*57 in HLA-B\*57<sup>+</sup> HIC (black circles) and in HLA-B\*57<sup>+</sup> chronic progressors (clear circles). (A) Functional avidity was determined in an IFN- $\gamma$  ELISpot assay using peptide dilutions and defined as the peptide concentration required to induce 50% of the maximal response (EC<sub>50%</sub>). (B) Cumulative HLA-B\*57-restricted responses were measured by IFN- $\gamma$  ELISpot assay and are expressed as SFC/10<sup>6</sup> PBMC. (C) Functional avidity do not correlated with the frequency of HIV-specific CD8<sup>+</sup> T cells measured by ELISpot IFN- $\gamma$  assay in HLA-B\*57<sup>+</sup> chronic progressors. (D) Percentages of HIV-specific CD8<sup>+</sup> T cells CFSE<sub>Low</sub> after 6 days of culture with the appropriate peptide. (E) Percentages of IL-2-producing CD8<sup>+</sup> T cells after 15h of HIV-specific stimulation. (F) CD127 expression of HLA-B\*57- restricted HIV-specific CD8<sup>+</sup> T cells.

**Supplemental Table: Comparison of the qualitative features of HIV-specific CD8<sup>+</sup> T cells in HLA-B\*57<sup>+</sup> weak and strong viral suppressors (WVS and SVS) and in HLA-B\*57<sup>-</sup> weak and strong viral suppressors**

|                                                                                 | HLA-B*57 <sup>+</sup> WVS | HLA-B*57 <sup>+</sup> SVS    | P    | HLA-B*57 <sup>-</sup> WVS | HLA-B*57 <sup>-</sup> SVS | P     |
|---------------------------------------------------------------------------------|---------------------------|------------------------------|------|---------------------------|---------------------------|-------|
| Number                                                                          | 22                        | 24                           |      | 28                        | 22                        |       |
| Sensitivity (EC <sub>50</sub> , M)                                              | 10-8.1 [7.7-8.8]          | 10 <sup>-7.8</sup> [6.8-8.8] | 0.57 | 10-6.7 [6.5-7.0]          | 10-7.0 [6.4-7.7]          | 0.52  |
| IFN-γ producing CD8 <sup>+</sup> T cells (%)                                    | 0.24 [0.03-0.55]          | 0.32 [0.11-0.55]             | 0.18 | 0.04 [0.03-0.16]          | 0.14 [0.01-0.51]          | 0.93  |
| IL-2 producing CD8 <sup>+</sup> T cells (%)                                     | 0.03 [0.01-0.12]          | 0.07 [0.03-0.17]             | 0.15 | 0.02 [0.01-0.04]          | 0.01 [0.00-0.04]          | 0.23  |
| CFSE <sub>low</sub> HIV-specific CD8 <sup>+</sup> T cells (%)                   | 84 [68-92]                | 80 [62-91]                   | 0.31 | 19 [3-57]                 | 16 [0-75]                 | 0.93  |
| CD127 <sup>+</sup> HIV-specific CD8 <sup>+</sup> T cells (%)                    | 70 [40-82]                | 66 [40-80]                   | 0.77 | 45 [15-64]                | 22 [13-43]                | 0.34  |
| CD27 <sup>+</sup> CD45RO <sup>+</sup> HIV-specific CD8 <sup>+</sup> T cells (%) | 65 [48-70]                | 48 [40-62]                   | 0.15 | 51 [41-59]                | 42 [29-57]                | 0.38  |
| CD57 <sup>+</sup> HIV-specific CD8 <sup>+</sup> T cells (%)                     | 22 [16-30]                | 32 [21-48]                   | 0.12 | 41 [26-61]                | 38 [33-66]                | 0.80  |
| CD38 <sup>+</sup> HIV-specific CD8 <sup>+</sup> T cells (%)                     | 12 [8-23]                 | 13 [9-21]                    | 0.85 | 22 [13-31]                | 11 [7-15]                 | <0.01 |
| HLA-DR <sup>+</sup> HIV-specific CD8 <sup>+</sup> T cells (%)                   | 34 [16-58]                | 53 [38-66]                   | 0.04 | 37 [24-49]                | 50 [41-61]                | 0.03  |
